# Supplementary material for: Distribution profiles of diphenhydramine and lidocaine in scalp, axillary, and pubic hairs measured by micro-segmental hair analysis: good indicator for discrimination between administration and external contamination of the drugs
Source: Springer Nature journal article supplement (doi:10.1007/s11419-021-00590-x), 2021-07-31
Supplement: MOESM1 [file 19408310]

## Supplementary material

**Table S1** Analytical conditions for the detection of analytes in hair samples

|                  |                                                                                                                                                                           |                                  |                     |                       |
|------------------|---------------------------------------------------------------------------------------------------------------------------------------------------------------------------|----------------------------------|---------------------|-----------------------|
| LC-MS/MS         | Waters ACQUITY UPLC I-Class and Xevo TQ-S                                                                                                                                 |                                  |                     |                       |
| Column           | Imtakt Cadenza CD-C18 HT (150 mm × 2.0 mm, 3 μm)                                                                                                                          |                                  |                     |                       |
| Column temp.     | 40 °C                                                                                                                                                                     |                                  |                     |                       |
| Flow rate        | 0.2 mL/min (0–0.2 min) – 0.3 mL/min (0.2–2 min)<br>– 0.4 mL/min (2–4 min) – 0.5 mL/min (4–5 min)                                                                          |                                  |                     |                       |
| Mobile phase     | A: 5 mM ammonium acetate + 0.05 % formic acid<br>B: Acetonitrile<br>5 % B (0–0.2 min) – 20 % B (0.2–2 min) – 50 % B (2–3 min)<br>– 95 % B (3–4.5 min) – 5 % B (4.5–5 min) |                                  |                     |                       |
| Ionization       | Electrospray ionization                                                                                                                                                   |                                  |                     |                       |
| Acquisition mode | SRM                                                                                                                                                                       |                                  |                     |                       |
| SRM conditions   | Analyte                                                                                                                                                                   | Monitoring ion<br>( <i>m/z</i> ) | Cone voltage<br>(V) | Collision energy (eV) |
|                  | DP                                                                                                                                                                        | 256 > 167                        | 5                   | 15                    |
|                  | DDP                                                                                                                                                                       | 242 > 167                        | 5                   | 15                    |
|                  | LD                                                                                                                                                                        | 235 > 86                         | 30                  | 15                    |
|                  | DLD                                                                                                                                                                       | 207 > 58                         | 4                   | 12                    |
|                  | CP                                                                                                                                                                        | 275 > 230                        | 2                   | 16                    |
|                  | ME                                                                                                                                                                        | 180 > 162                        | 4                   | 12                    |
|                  | CP- <i>d</i> <sub>6</sub>                                                                                                                                                 | 281 > 230                        | 2                   | 16                    |

Liquid chromatograph-tandem mass spectrometer (LC-MS/MS), selected reaction monitoring (SRM), diphenhydramine (DP), desmethyldiphenhydramine (DDP), lidocaine (LD), desethylidocaine (DLD), chlorpheniramine (CP), methylephedrine (ME)

**Table S2** Analytical validation using spiked 0.4-mm hair segment samples

| Analyte | LOD<br>(pg/mg) | LLOQ<br>(pg/mg) | Spiked conc.<br>(pg/mg) | Ac<br>(%<br>bias) <sup>a</sup> | Pc<br>(%<br>CV) <sup>b</sup> | MF<br>(%) <sup>c</sup> | Recovery<br>(%) <sup>c</sup> |
|---------|----------------|-----------------|-------------------------|--------------------------------|------------------------------|------------------------|------------------------------|
| DP      | 5              | 50              | 50                      | -7.4                           | 14.0                         | 88 ± 12                | 76 ± 11                      |
|         |                |                 | 1000                    | 1.6                            | 1.9                          | 120 ± 6                | 100 ± 3                      |
| DDP     | 5              | 25              | 50                      | -11.0                          | 5.7                          | 85 ± 17                | 88 ± 13                      |
|         |                |                 | 1000                    | 2.2                            | 3.5                          | 124 ± 10               | 102 ± 5                      |

|     |   |    |      |      |     |          |         |
|-----|---|----|------|------|-----|----------|---------|
| LD  | 5 | 50 | 50   | -4.8 | 9.5 | 103 ± 15 | 96 ± 4  |
|     |   |    | 1000 | -0.3 | 4.2 | 114 ± 5  | 115 ± 7 |
| DLD | 5 | 25 | 50   | -3.5 | 7.5 | 117 ± 8  | 112 ± 8 |
|     |   |    | 1000 | 1.4  | 7.1 | 120 ± 7  | 123 ± 8 |

Limit of detection (LOD), lower limit of quantification (LLOQ), accuracy (Ac), precision (Pc), coefficient of variation (CV), matrix factor (MF)

The weights of each 0.4-mm blank hair segment were regarded as 4 µg/segment

<sup>a</sup> Average of five measurements

<sup>b</sup> Calculated based on measurements on five different days

<sup>c</sup> Calculated using 0.4-mm hair segments from six drug-free subjects
